# Supplementary material
Source: PubMed Central journal article supplement (PMC4256764)
Supplement: 383f2bc89a1cfac72ca045f52dc88cff_genetics.114.168732-9.pdf [file 383f2bc89a1cfac72ca045f52dc88cff_genetics.114.168732-9.pdf]

**Table S1 STS primers used in this study**

| <b>Primer</b> | <b>Forward</b>              | <b>Reverse</b>             |
|---------------|-----------------------------|----------------------------|
| P1            | 5'-TGCCCTACTGGAGAAT-3'      | 5'-CAGCCACAGTACATAACA-3'   |
| P2            | 5'-GGCTCGATCTCATTCTATAT-3'  | 5'-ACGTACCAAATGTAAAGTGT-3' |
| P3            | 5'-AGCAGTACTAAAGTTCAGC-3'   | 5'-GACTTACCAAAGTGGCTCA-3'  |
| P4            | 5'-AGGTACTGATTCTCATGCTCG-3' | 5'-CAACATTGGCACAATCAAGG-3' |
| P5            | 5'-CTCCCTCTCGACGACTTGA-3'   | 5'-TACCAGCAGATTCAGGATT-3'  |
| P6            | 5'-CCAGCACTACCATAAAACA-3'   | 5'-CTGGTGCTAGGTAATGATG-3'  |
| P7            | 5'-AAATATCTGATCCCAGTG-3'    | 5'-AAATATCTGATCCCAGTG-3'   |
