# Supplementary material
Source: PubMed Central journal article supplement (PMC4256764)
Supplement: 9632d172c153d0c017abf90ad22b7ae7_genetics.114.168732-3.pdf [file 9632d172c153d0c017abf90ad22b7ae7_genetics.114.168732-3.pdf]

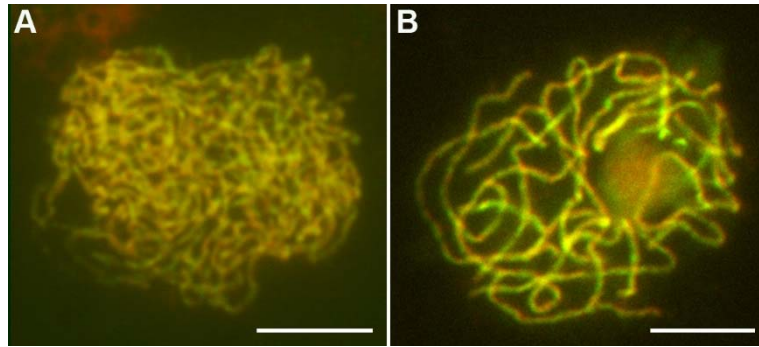

**Figure S7** Immunolocalization of OsREC8, PAIR2 and PAIR3 in wild type meiocytes.

A, The localization of PAIR2 (green) at zygotene.

B, The localization of PAIR3 (green) at pachytene.

OsREC8 (red) signals were used to indicate chromosomes. Scale bars, 5  $\mu\text{m}$ .
