# Supplementary material
Source: PubMed Central journal article supplement (PMC4256764)
Supplement: a229feb64841805d570024ca12e1ec37_genetics.114.168732-2.pdf [file a229feb64841805d570024ca12e1ec37_genetics.114.168732-2.pdf]

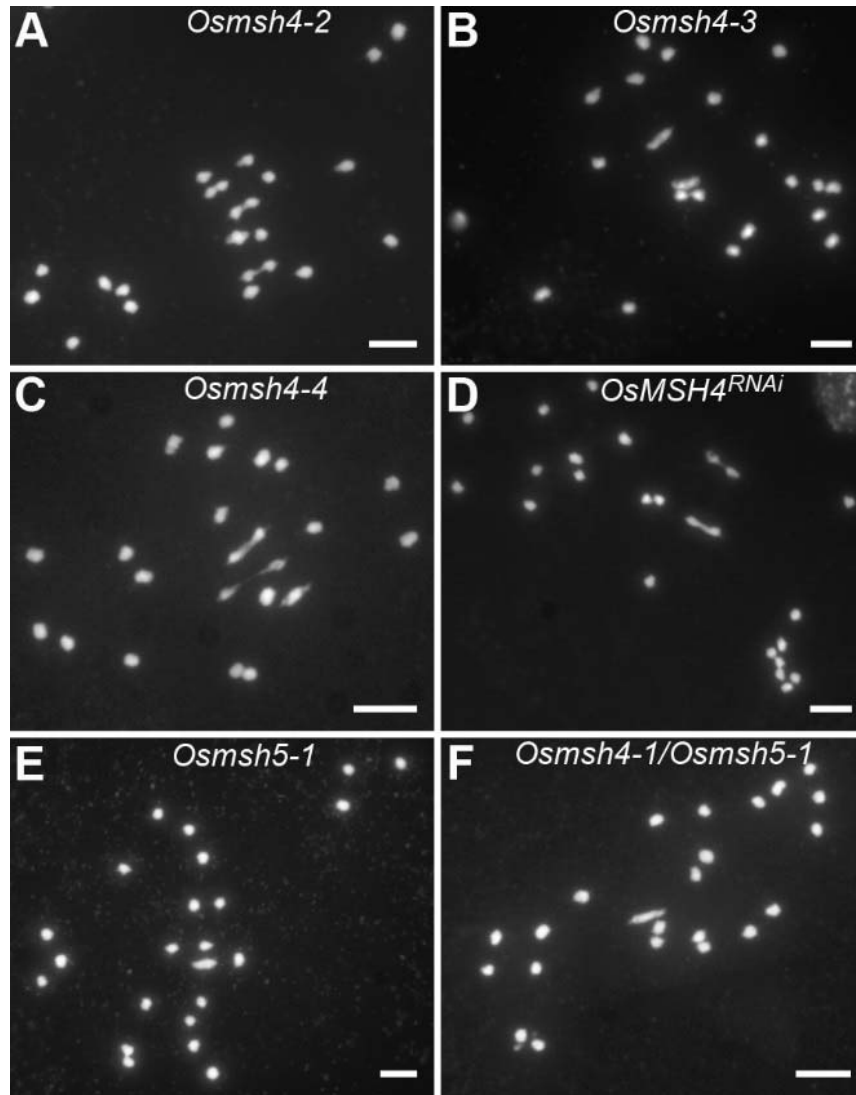

**Figure S4** Defects in different mutants.

A, *Osmsh4-2*.

B, *Osmsh4-3*.

C, *Osmsh4-4*.

D, *OsMSH4<sup>RNAi</sup>*.

E, *Osmsh5-1*.

F, *Osmsh4-1 Osmsh5-1*.

Chromosomes were stained with DAPI. Scale bars, 5  $\mu$ m.
