# Supplementary material
Source: PubMed Central journal article supplement (PMC4256764)
Supplement: b2b51eb9e16c501693885542d41c4daa_genetics.114.168732-6.pdf [file b2b51eb9e16c501693885542d41c4daa_genetics.114.168732-6.pdf]

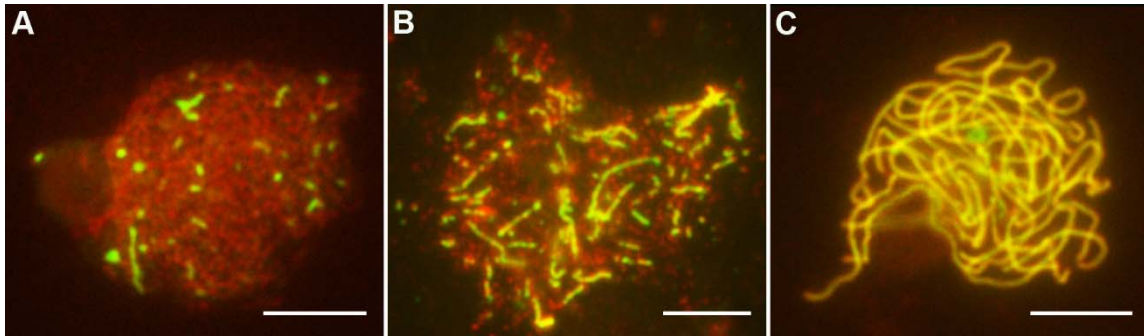

**Figure S6** Immunolocalization of OsREC8 (red) and ZEP1 (green) in wild type meiocytes.

A, The localization of ZEP1 at leptotene.

B, The localization of ZEP1 at zygotene.

C, The localization of ZEP1 at pachytene.

OsREC8 signals (red) were used to indicate chromosomes. Scale bars, 5  $\mu\text{m}$ .
