# Supplementary material
Source: PubMed Central journal article supplement (PMC4256764)
Supplement: c5ef0fbcaac89427644ab5f1fb953328_genetics.114.168732-7.pdf [file c5ef0fbcaac89427644ab5f1fb953328_genetics.114.168732-7.pdf]

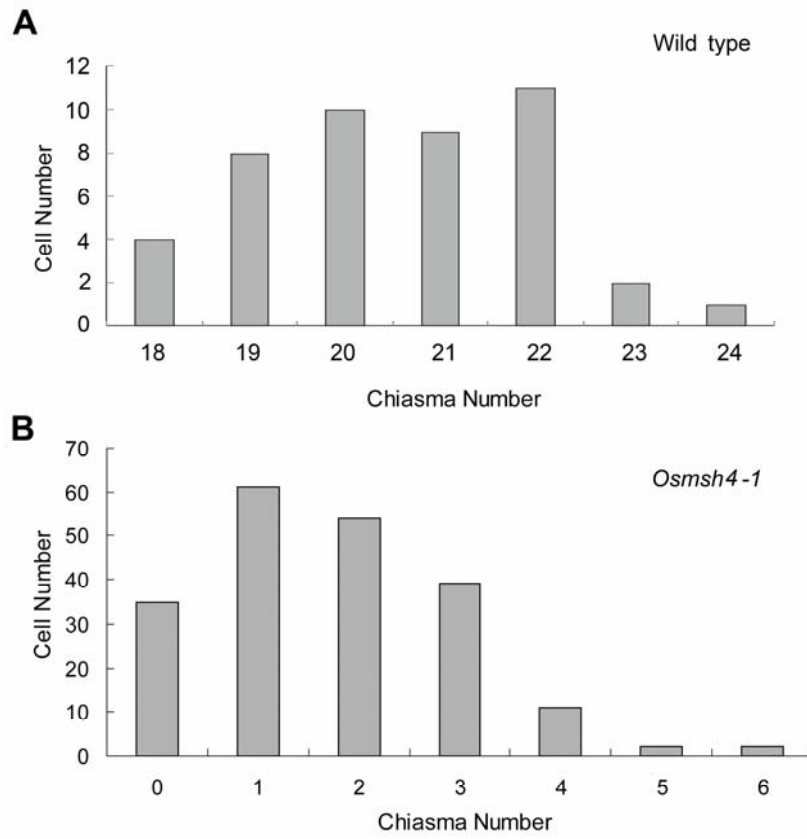

**Figure S5 Chiasma distribution in wild type and *Osmsh4-1*.**

A, Statistical analysis of the chiasma distribution in wild type meiocytes.

B, Statistical analysis of the chiasma distribution in *Osmsh4-1* meiocytes.
