# Supplementary material
Source: PubMed Central journal article supplement (PMC4256764)
Supplement: d8be67f6dc370d663c80c87e7dca2fb4_genetics.114.168732-5.pdf [file d8be67f6dc370d663c80c87e7dca2fb4_genetics.114.168732-5.pdf]

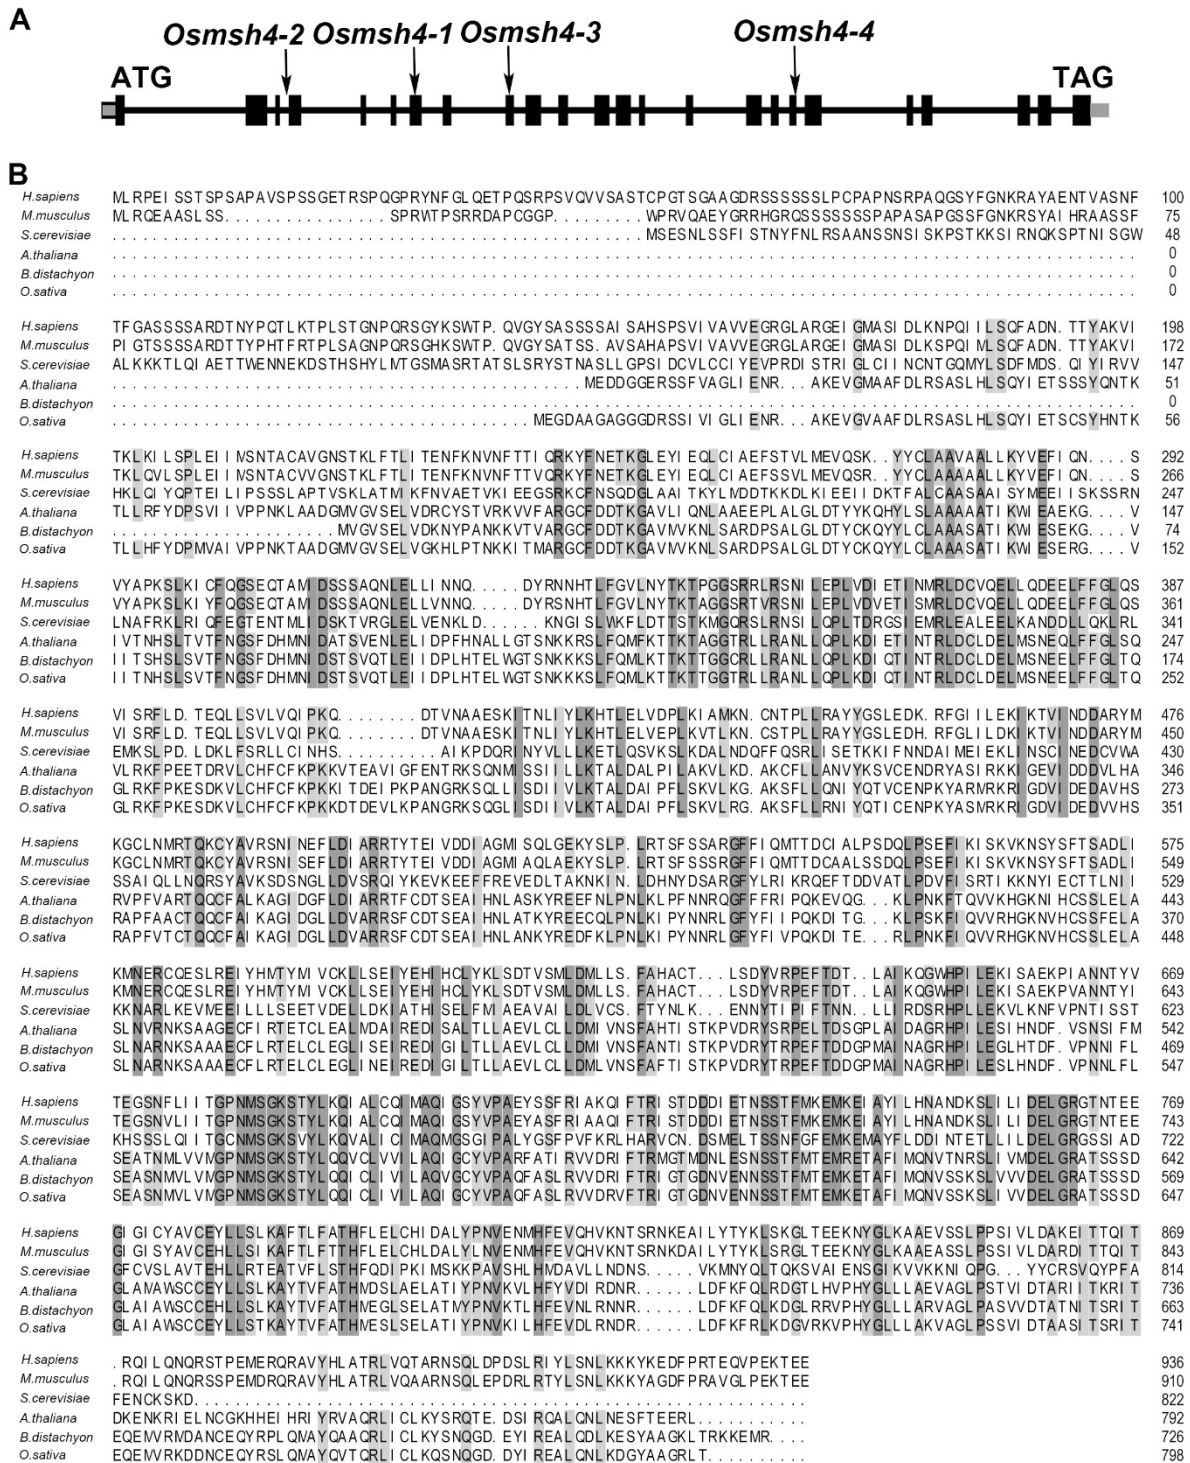

**Figure S2 Organization of the *Osmsh4* gene and the protein alignment of MSH4 homologues.**

A, Schematic representation of the *Osmsh4* gene and mutation sites in *Osmsh4* alleles. Translated regions are shown as black boxes and untranslated regions are shown as lines. The arrows indicate different mutation sites of *Osmsh4* mutants.

B, Protein alignment of MSH4 homologues. Identical amino acids are shaded in gray, while similar amino acids are shaded in silver gray.
