# Supplementary material
Source: PubMed Central journal article supplement (PMC4256764)
Supplement: e3d25bba42ce3b2eeed61ed5ed49abeb_genetics.114.168732-4.pdf [file e3d25bba42ce3b2eeed61ed5ed49abeb_genetics.114.168732-4.pdf]

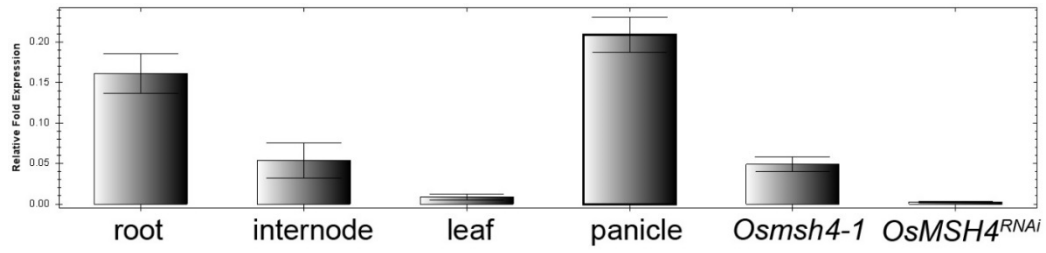

**Figure S3 Expression analysis of *OsMSH4*.** Transcription levels of *OsMSH4* in both wild type and *Osms4* (*Osms4-1*, *OsMSH4<sup>RNAi</sup>*) displayed by Real-Time PCR, with *Ubiquitin* as the endogenous control. Error bars represent SD (n = 3).
