# Supplementary material
Source: PubMed Central journal article supplement (PMC4256764)
Supplement: e14b37eae87203e47217bb916f09e8bd_genetics.114.168732-8.pdf [file e14b37eae87203e47217bb916f09e8bd_genetics.114.168732-8.pdf]

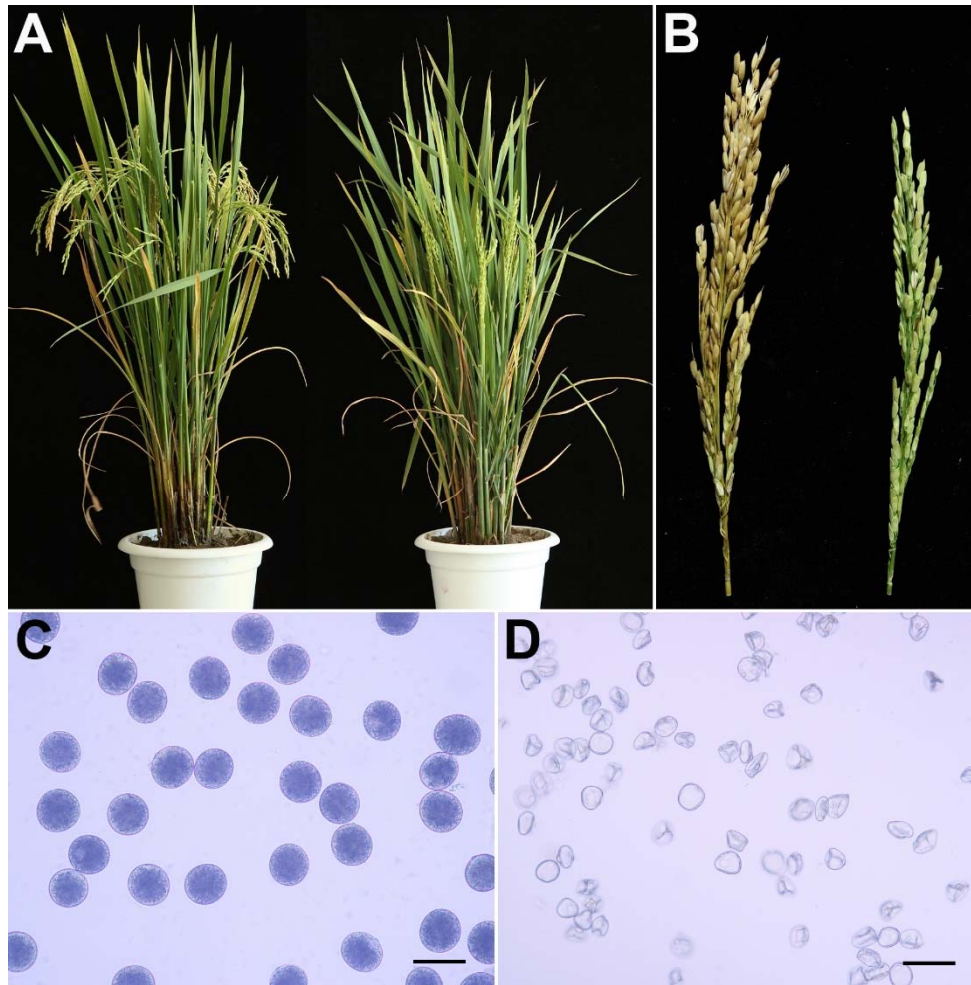

**Figure S1** Phenotype characterization of the *Osmsh4-1* mutant.

A, Comparison of a wild type (WT) plant (left) and an *Osmsh4-1* plant (right).

B, Comparison of WT panicles (left) and *Osmsh4-1* panicles (right).

C, I<sub>2</sub>-KI staining of wild type pollen grains.

D, I<sub>2</sub>-KI staining of *Osmsh4-1* pollen grains. Scale bars, 50 μm.
